# Supplementary material for: Development of a Broth Microdilution Method for Exebacase Susceptibility Testing
Source: PubMed Central journal article supplement (PMC8218677; doi:10.1128/aac.02587-20), 2021-06-17
Supplement: aac.02587-20-s0001.pdf [file aac.02587-20-s0001.pdf]

1

## Supplemental Material

2 **TABLE S1** Strains used in this study

| Designation | Type | Description                                                                                                       | Source and/or Reference                                                                   |
|-------------|------|-------------------------------------------------------------------------------------------------------------------|-------------------------------------------------------------------------------------------|
| ATCC 49521  | MSSA | Capsule serotype V strain, bacteremia isolate                                                                     | ATCC (1)                                                                                  |
| ATCC 25923  | MSSA | Quality control strain                                                                                            | ATCC (2)                                                                                  |
| JMI 2559    | MSSA | Isolated from respiratory tract infection                                                                         | JMI Laboratories                                                                          |
| JMI 3126    | MSSA | Isolated from respiratory tract infection                                                                         | JMI Laboratories                                                                          |
| NRS 143     | MSSA | <i>agr</i> III                                                                                                    | BEI Resources (3)                                                                         |
| ATCC 43300  | MRSA | Reference strain, <i>SCCmec</i> type II, PVL-negative                                                             | ATCC (2)                                                                                  |
| NRS 123     | MRSA | Strain MW2, <i>SCCmec</i> type IV, PVL-positive, PFGE type USA400                                                 | BEI Resources (4)                                                                         |
| CAIRD 426   | MRSA | PFGE type USA100, Hospital-acquired MRSA                                                                          | David Nicholau, Center for Anti-Infective Research and Development, Hartford Hospital (5) |
| NRS 100     | MRSA | Strain COL, <i>SCCmec</i> type I, Panton-Valentine leucocidin (PVL) toxin-negative                                | BEI Resources, catalog number NR-45906 (6)                                                |
| JMI 227     | MRSA | Clinical blood isolate, <i>SCCmec</i> type IV, PVL-negative                                                       | JMI Laboratories                                                                          |
| CFS 954     | DRSA | Daptomycin-resistant derivative (MIC=4 µg/mL) of ATCC 43300 obtained in serial passage                            | (7)                                                                                       |
| CFS 1239    | DRSA | Daptomycin-resistant derivative (MIC=4 µg/mL) of ATCC 25923 obtained in serial passage                            | (7)                                                                                       |
| CFS 1238    | DRSA | Daptomycin-resistant derivative (MIC=8 µg/mL) of ATCC 25923 obtained in serial passage                            | (7)                                                                                       |
| CFS 1237    | DRSA | Daptomycin-resistant derivative (MIC=8 µg/mL) of <i>S. aureus</i> strain MW2 (NRS 123) obtained in serial passage | (7)                                                                                       |
| CFS 1233    | DRSA | Daptomycin-resistant derivative (MIC=16 µg/mL) of <i>S. aureus</i>                                                | (7)                                                                                       |

|         |      |                                                                                                                            |                                            |
|---------|------|----------------------------------------------------------------------------------------------------------------------------|--------------------------------------------|
|         |      | strain MW2 (NRS 123) obtained in serial passage                                                                            |                                            |
| NRS 127 | LRSA | Linezolid-resistant (MIC=8 µg/mL), sputum isolate, SCCmec II, MLST sequence type (ST) 5, eGenomic spa type 2               | BEI Resources catalog number NR-45930 (8)  |
| NRS 271 | LRSA | Linezolid-resistant (MIC=32 µg/mL), wound drain site isolate, SCCmec IV, MLST sequence type (ST) 22; eGenomic spa type 382 | BEI Resources catalog number NR-46062 (8)  |
| NRS 119 | LRSA | Linezolid-resistant (MIC=64 µg/mL), SCCmec IV, MLST sequence type (ST) 507, eGenomic spa type 7                            | BEI Resources catalog number NR-45924 (8)  |
| NRS 121 | LRSA | Linezolid-resistant (MIC=64 µg/mL), SCCmec IV; MLST sequence type (ST) 507; eGenomic spa type 7                            | BEI Resources catalog number NR-45926 (8)  |
| NRS 120 | LRSA | Linezolid-resistant (MIC=64 µg/mL, closely related to NRS 119                                                              | BEI Resources (9)                          |
| VRS1    | VRSA | Vancomycin-resistant (MIC=>32 µg/mL), infected catheter source, PFGE type USA100; MLST (ST) 5                              | BEI Resources catalog number NR-46410 (10) |
| VRS2    | VRSA | Vancomycin-resistant (MIC=64 µg/mL), plantar ulcer isolate, PFGE type USA100; MLST (ST) 5                                  | BEI Resources catalog number NR-46411 (11) |
| VRS3a   | VRSA | Vancomycin-resistant (MIC=>32 µg/mL), nephrostomy tube exit site isolate, PFGE type USA800; MLST (ST) 5                    | BEI Resources catalog number NR-46412 (12) |
| VRS3b   | VRSA | Vancomycin-resistant (MIC=>32 µg/mL), nephrostomy tube exit site isolate, PFGE type USA800; MLST (ST) 5                    | BEI Resources catalog number NR-46413 (12) |
| VRS4    | VRSA | Vancomycin-resistant (MIC=>32 µg/mL), wound isolate, PFGE type USA100; MLST (ST) 5                                         | BEI Resources catalog number NR-46414 (13) |

3 Abbreviations = MSSA, methicillin-sensitive *S. aureus*; MRSA, methicillin-resistant *S. aureus*;  
4 DRSA, daptomycin-resistant *S. aureus*; LRSA, linezolid-resistant *S. aureus*; VRSA, vancomycin-  
5 resistant *S. aureus*; PFGE, Pulsed Field Gel Electrophoresis; PVL, Pantón–Valentine Leucocidin;  
6 ATCC, American Type Culture Collection; MLST, Multilocus Sequence Type; and SCC,  
7 *Staphylococcus* Cassette Chromosome.

8

9 **TABLE S2** Impact of DTT on exebacase MICs ( $\mu\text{g}/\text{mL}$ ) against *S. aureus* strain NRS 123 in CAMHB  
 10 supplemented with 25% horse serum (with and without freeze/thaw cycles)<sup>a</sup>

| <b>DTT concentration</b> | <b>MIC<br/>(no freeze/thaw)</b> | <b>MIC<br/>(yes freeze/thaw)</b> | <b>Trailing effect<sup>b</sup></b> |
|--------------------------|---------------------------------|----------------------------------|------------------------------------|
| No DTT                   | 1                               | 4                                | No                                 |
| 0.01 mM                  | 1                               | 2                                | No                                 |
| 0.05 mM                  | 1                               | 2                                | No                                 |
| 0.1 mM                   | 1                               | 2                                | No                                 |
| 0.125 mM                 | 1                               | 2                                | No                                 |
| 0.25 mM                  | 0.5/1                           | 0.5/1                            | No                                 |
| 0.5 mM                   | 0.5                             | 0.5                              | No                                 |
| 1 mM                     | 0.5                             | 0.5                              | No                                 |
| 2 mM                     | 0.5                             | 0.5                              | No                                 |

11 <sup>a</sup>Media was prepared using reagents from the following sources: CAMHB (BBL Mueller Hinton  
 12 broth II, cation-adjusted), Becton Dickenson and Co. catalog number 212322; horse serum  
 13 (donor herd), Sigma-Aldrich catalog number H1270; and DTT, Sigma-Aldrich catalog number  
 14 646563.

15 <sup>b</sup>Refers to the analysis after a freeze/thaw cycle.

16  
 17  
 18  
 19  
 20  
 21  
 22  
 23  
 24  
 25  
 26  
 27  
 28  
 29  
 30  
 31  
 32  
 33  
 34  
 35  
 36  
 37  
 38  
 39  
 40

41 **TABLE S3** Effect of varying CAMHB sources on exebacase MICs determined against 25 *S. aureus*  
 42 strains in CAMHB-HSD<sup>a</sup>

| CAMHB source (catalog number) | Freeze/thaw | MIC (µg/mL)       |                   |          |
|-------------------------------|-------------|-------------------|-------------------|----------|
|                               |             | MIC <sub>50</sub> | MIC <sub>90</sub> | Range    |
| BBL™ BD (212322)              | No          | 0.5               | 1                 | 0.25 - 2 |
|                               | Yes         | 0.5               | 1                 | 0.25 - 2 |
| Sigma-Aldrich (90922)         | No          | 1                 | 2                 | 0.5 - 2  |
|                               | Yes         | 1                 | 2                 | 0.5 - 2  |
| Teknova (M5860)               | No          | 0.5               | 1                 | 0.25 - 1 |
|                               | Yes         | 0.5               | 1                 | 0.25 - 1 |
| BD (297963)                   | No          | 0.5               | 1                 | 0.25 - 1 |
|                               | Yes         | 0.5               | 1                 | 0.25 - 1 |

43 <sup>a</sup>Additional media reagents were obtained from the following sources: horse serum (donor herd),  
 44 Sigma-Aldrich catalog number H1270; and DTT, Sigma-Aldrich catalog number 646563.

45  
46  
47  
48  
49  
50  
51  
52  
53  
54  
55  
56  
57  
58  
59  
60  
61  
62  
63  
64  
65  
66  
67  
68  
69  
70  
71  
72  
73

74 **TABLE S4** Effect of varying DTT sources on exebacase MICs determined against 25 *S. aureus*  
 75 strains in CAMHB-HSD<sup>a</sup>

| DTT source (catalog number) | Freeze/thaw | MIC (µg/mL)       |                   |          |
|-----------------------------|-------------|-------------------|-------------------|----------|
|                             |             | MIC <sub>50</sub> | MIC <sub>90</sub> | Range    |
| Sigma-Aldrich (646563)      | No          | 0.5               | 1                 | 0.25 - 2 |
|                             | Yes         | 0.5               | 1                 | 0.25 - 2 |
| Sigma-Aldrich (43815-25G)   | No          | 0.5               | 1                 | 0.25 - 2 |
|                             | Yes         | 0.5               | 1                 | 0.25 - 2 |
| G-Biosciences (RC-046)      | No          | 0.5               | 1                 | 0.25 - 2 |
|                             | Yes         | 0.5               | 1                 | 0.25 - 2 |

76 <sup>a</sup>Additional media reagents were obtained from the following sources: CAMHB (BBL Mueller  
 77 Hinton broth II, cation-adjusted), Becton Dickenson and Co. catalog number 212322; and horse  
 78 serum (donor herd), Sigma-Aldrich catalog number H1270.

79  
 80  
 81  
 82  
 83  
 84  
 85  
 86  
 87  
 88  
 89  
 90  
 91  
 92  
 93  
 94  
 95  
 96  
 97  
 98  
 99  
 100  
 101  
 102  
 103  
 104  
 105  
 106  
 107  
 108

109 **TABLE S5** Effect of varying pH, bacterial inoculum, and incubation conditions on exebacase  
 110 MICs determined against 25 *S. aureus* strains in CAMHB-HSD<sup>a</sup>

| Condition             | Modification              | MIC <sub>50</sub> | MIC <sub>90</sub> | Range  |
|-----------------------|---------------------------|-------------------|-------------------|--------|
| Final pH              | Unadjusted (pH 7.4)       | 0.5               | 1                 | 0.25-2 |
|                       | Adjusted to pH 7.0        | 0.5               | 1                 | 0.25-2 |
|                       | Adjusted to pH 8.0        | 1                 | 1                 | 0.25-2 |
| Bacterial inoculum    | 5x10 <sup>6</sup> CFU/mL  | 0.5               | 1                 | 0.25-1 |
|                       | 5x10 <sup>5</sup> CFU/mL  | 0.5               | 1                 | 0.25-2 |
|                       | 1x10 <sup>5</sup> CFU/mL  | 0.5               | 1                 | 0.25-2 |
|                       | 5x10 <sup>4</sup> CFU/mL  | 0.5               | 1                 | 0.25-1 |
| Incubation conditions | Ambient air (37°C)        | 0.5               | 1                 | 0.25-2 |
|                       | Ambient air (30°C)        | 0.5               | 1                 | 0.25-1 |
|                       | 5% CO <sub>2</sub> (37°C) | 0.5               | 1                 | 0.25-2 |
| Incubation length     | 18 hours                  | 0.5               | 1                 | 0.25-2 |
|                       | 24 hours                  | 0.5               | 1                 | 0.25-1 |
|                       | 48 hours                  | 0.5               | 1                 | 0.25-2 |

111 <sup>a</sup>Media was prepared using reagents from the following sources: CAMHB (BBL Mueller Hinton  
 112 broth II, cation-adjusted), Becton Dickenson and Co. catalog number 212322; horse serum  
 113 (donor herd), Sigma-Aldrich catalog number H1270; and DTT, Sigma-Aldrich catalog number  
 114 646563.

115  
 116  
 117  
 118  
 119  
 120  
 121  
 122  
 123  
 124  
 125  
 126  
 127  
 128  
 129  
 130  
 131  
 132  
 133  
 134  
 135  
 136  
 137

138 **Table S6** Impact of long-term storage of exebacase dilution panels (in CAMHB-HSD) at -80°C on  
139 MICs determined against a set of 25 *S. aureus* strains<sup>a</sup>

| Storage time (days) <sup>a</sup> | MIC <sub>50</sub> | MIC <sub>90</sub> | Range  |
|----------------------------------|-------------------|-------------------|--------|
| 1                                | 0.5               | 0.5               | 0.25-1 |
| 3                                | 0.5               | 1                 | 0.25-2 |
| 7                                | 0.5               | 0.5               | 0.25-1 |
| 14                               | 0.5               | 1                 | 0.25-2 |
| 21                               | 0.5               | 1                 | 0.25-2 |
| 28                               | 0.5               | 1                 | 0.25-2 |
| 60                               | 0.5               | 0.5               | 0.25-2 |
| 90                               | 0.5               | 1                 | 0.25-2 |
| 120                              | 0.5               | 1                 | 0.25-2 |
| 180                              | 0.5               | 0.5               | 0.25-1 |
| 365                              | 0.5               | 0.5               | 0.25-2 |

140 <sup>a</sup>Frozen panels were prepared using reagents from the following sources: CAMHB (BBL Mueller  
141 Hinton broth II, cation-adjusted), Becton Dickenson and Co. catalog number 212322; horse serum  
142 (donor herd), Sigma-Aldrich catalog number H1270; and DTT, Sigma-Aldrich catalog number  
143 646563.

144  
145  
146  
147  
148  
149  
150  
151  
152  
153  
154  
155  
156  
157  
158  
159  
160  
161  
162  
163  
164

| Sample number | Source        | Catalog number | Lot number | Date of draw  | Collection         | Sex          | Breed                             |
|---------------|---------------|----------------|------------|---------------|--------------------|--------------|-----------------------------------|
| 1             | Sigma-Aldrich | H1270-500ML    | 15G382     | Summer 2015   | Donor Herd, USA    | Mixed        | Mixed                             |
| 2             | Corning       | 35-030-CV      | 35030105   | Fall 2014     | Donor Equines, USA | Male (Fixed) | Belgians and Percherons           |
| 3             | Sigma-Aldrich | 12449C         | 14A277     | Winter 14     | Donor Herd, USA    | Mixed        | Mixed                             |
| 4             | RMBIO         | DES-BBT-5XM    | 20160601ES | Spring 2016   | Donor Herd, USA    | Mixed        | n.a.                              |
| 5             | RMBIO         | DES-BBT-5XM    | 20150520ES | Spring 2015   | Donor Herd, USA    | Mixed        | n.a.                              |
| 6             | RMBIO         | DES-BBT-5XM    | 20160113ES | Winter 2015   | Donor Herd, USA    | Mixed        | n.a.                              |
| 7             | ATCC          | 30-2040        | 62724716   | Winter 2014/5 | Donor Herd, USA    | Male         | Mixed                             |
| 8             | CBI           | B63538         | 1-167-A    | Winter 2016   | Donor Herd, USA    | Male (fixed) | Belgians, Percherons, Clydesdales |
| 9             | CBI           | B63539         | 2-167-B    | Spring 2016   | Donor Herd, USA    | Male (fixed) | Belgians, Percherons, Clydesdales |
| 10            | CBI           | B63540         | 3-167-C    | Summer 2016   | Donor Herd, USA    | Male (fixed) | Belgians, Percherons, Clydesdales |
| 11            | CBI           | B63541         | 4-167-D    | Fall 2015     | Donor Herd, USA    | Male (fixed) | Belgians, Percherons, Clydesdales |
| 12            | CBI           | B63542         | 5-167-E    | Summer 2016   | 1 individual, USA  | Male (fixed) | Belgians, Percherons, Clydesdales |
| 13            | Lampire       | n.a.           | 16H29000   | Spring 2016   | 1 individual, USA  | Female       | Thoroughbred                      |
| 14            | Lampire       | n.a.           | 16H29001   | Fall 2015     | 1 individual, USA  | Female       | Thoroughbred                      |

166 <sup>a</sup>Abbreviations = RMBIO, Rocky Mountain Biologicals, Inc.; ATCC, American Type Culture Collection; CBI, Central Biomedica Inc.; and  
167 n.a., not available.

168  
169  
170  
171  
172  
173  
174  
175



176  
177  
178  
179  
180  
181  
182  
183  
184  
185  
186  
187  
188  
189  
190  
191  
192  
193  
194  
195  
196  
197  
198  
199  
200  
201  
202  
203  
204  
205  
206  
207  
208  
209  
210  
211  
212  
213  
214  
215  
216  
217  
218  
219  
220  
221  
222

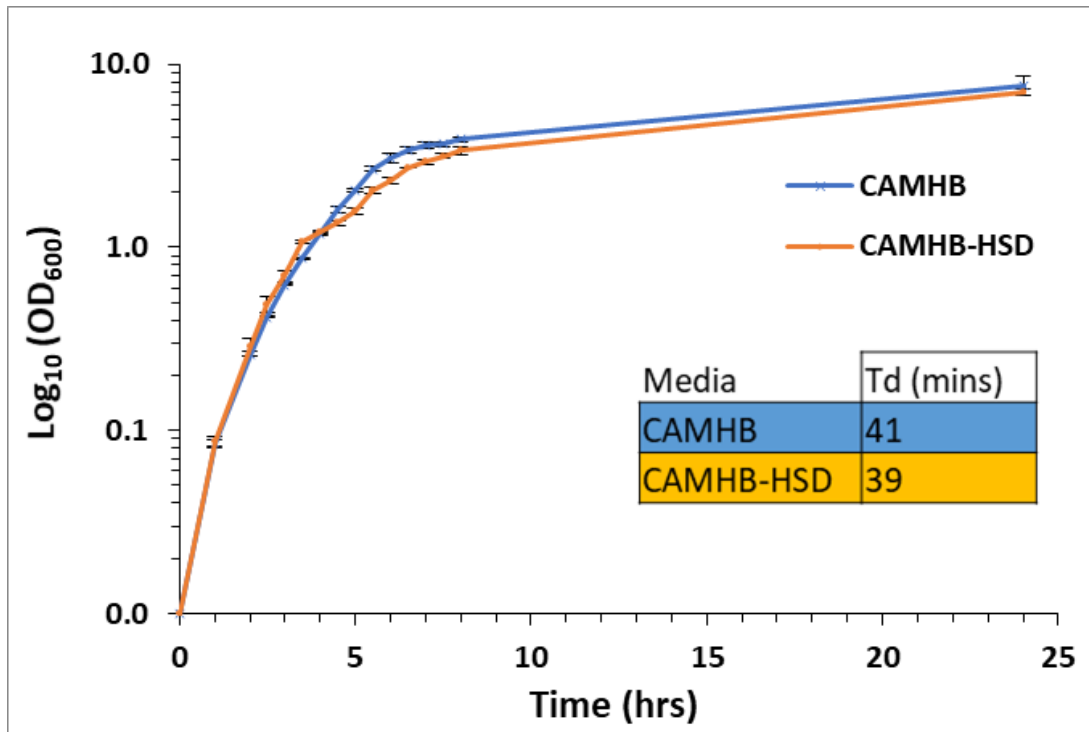

**FIG S1** Growth kinetics of *S. aureus* strain ATCC 29213 cultured in CAMHB and CAMHB-HSD media. The analysis in each media type was performed in triplicate and each point is represented as the mean  $\pm$  standard deviation. The doubling time (Td) for each culture in exponential phase is indicated.

223 REFERENCES

224

- 225 1. Fattom AI, Sarwar J, Ortiz A, Naso R. 1996. A *Staphylococcus aureus* capsular polysaccharide (CP)  
226 vaccine and CP-specific antibodies protect mice against bacterial challenge. *Infect Immun*  
227 64:1659-65.
- 228 2. CLSI. 2019. Performance Standards for Antimicrobial Susceptibility Testing, Document M100,  
229 29th Ed. Clinical and Laboratory Standards Institute, Wayne, PA.
- 230 3. Welsh KJ, Abbott AN, Lewis EM, Gardiner JM, Kruzel MC, Lewis CT, Mohr JF, Wanger A, Armitige  
231 LY. 2010. Clinical characteristics, outcomes, and microbiologic features associated with  
232 methicillin-resistant *Staphylococcus aureus* bacteremia in pediatric patients treated with  
233 vancomycin. *J Clin Microbiol* 48:894-9.
- 234 4. Baba T, Bae T, Schneewind O, Takeuchi F, Hiramatsu K. 2008. Genome sequence of  
235 *Staphylococcus aureus* strain Newman and comparative analysis of staphylococcal genomes:  
236 polymorphism and evolution of two major pathogenicity islands. *J Bacteriol* 190:300-10.
- 237 5. Keel RA, Tessier PR, Crandon JL, Nicolau DP. 2012. Comparative efficacies of human simulated  
238 exposures of tedizolid and linezolid against *Staphylococcus aureus* in the murine thigh infection  
239 model. *Antimicrob Agents Chemother* 56:4403-7.
- 240 6. Gill SR, Fouts DE, Archer GL, Mongodin EF, Deboy RT, Ravel J, Paulsen IT, Kolonay JF, Brinkac L,  
241 Beanan M, Dodson RJ, Daugherty SC, Madupu R, Angiuoli SV, Durkin AS, Haft DH, Vamathevan J,  
242 Khouri H, Utterback T, Lee C, Dimitrov G, Jiang L, Qin H, Weidman J, Tran K, Kang K, Hance IR,  
243 Nelson KE, Fraser CM. 2005. Insights on evolution of virulence and resistance from the complete  
244 genome analysis of an early methicillin-resistant *Staphylococcus aureus* strain and a biofilm-  
245 producing methicillin-resistant *Staphylococcus epidermidis* strain. *J Bacteriol* 187:2426-38.
- 246 7. Schuch R, Lee HM, Schneider BC, Sauve KL, Law C, Khan BK, Rotolo JA, Horiuchi Y, Couto DE, Raz  
247 A, Fischetti VA, Huang DB, Nowinski RC, Wittekind M. 2014. Combination therapy with lysin CF-  
248 301 and antibiotic is superior to antibiotic alone for treating methicillin-resistant *Staphylococcus*  
249 *aureus*-induced murine bacteremia. *J Infect Dis* 209:1469-78.
- 250 8. Silva-Del Toro SL, Greenwood-Quaintance KE, Patel R. 2016. In vitro activity of tedizolid against  
251 linezolid-resistant staphylococci and enterococci. *Diagn Microbiol Infect Dis* 85:102-4.
- 252 9. Tsiodras S, Gold HS, Sakoulas G, Eliopoulos GM, Wennersten C, Venkataraman L, Moellering RC,  
253 Ferraro MJ. 2001. Linezolid resistance in a clinical isolate of *Staphylococcus aureus*. *Lancet*  
254 358:207-8.
- 255 10. Centers for Disease C, Prevention. 2002. *Staphylococcus aureus* resistant to vancomycin--United  
256 States, 2002. *MMWR Morb Mortal Wkly Rep* 51:565-7.
- 257 11. Centers for Disease C, Prevention. 2002. Vancomycin-resistant *Staphylococcus aureus*--  
258 Pennsylvania, 2002. *MMWR Morb Mortal Wkly Rep* 51:902.
- 259 12. Centers for Disease C, Prevention. 2004. Vancomycin-resistant *Staphylococcus aureus*--New  
260 York, 2004. *MMWR Morb Mortal Wkly Rep* 53:322-3.
- 261 13. Sievert DM, Rudrik JT, Patel JB, McDonald LC, Wilkins MJ, Hageman JC. 2008. Vancomycin-  
262 resistant *Staphylococcus aureus* in the United States, 2002-2006. *Clin Infect Dis* 46:668-74.

263
